# Supplementary material for: Coping with the COVID-19 Pandemic: Perceived Changes in Psychological Vulnerability, Resilience and Social Cohesion before, during and after Lockdown
Source: MDPI journal article supplement (doi:10.3390/ijerph19063290), 2022-03-10
Supplement: s1 [file s1]

## Supplement S2. Item statistics

**Table S1.** Item and composite statistics for vulnerability and resilience indicators

|                                           | scale<br>range | T1       |           |                   | T2       |           |                   | T3       |           |                   |
|-------------------------------------------|----------------|----------|-----------|-------------------|----------|-----------|-------------------|----------|-----------|-------------------|
|                                           |                | <i>M</i> | <i>SD</i> | $\alpha$          | <i>M</i> | <i>SD</i> | $\alpha$          | <i>M</i> | <i>SD</i> | $\alpha$          |
| <i>Vulnerability indicators</i>           |                |          |           |                   |          |           |                   |          |           |                   |
| Burdens                                   | 0 - 8          | 1.38     | .93       | .86<br>[.85, .86] | 2.26     | 1.07      | .84<br>[.83, .85] | 1.82     | 1.01      | .85<br>[.85, .86] |
| Appropriateness of<br>protection measures |                |          |           | .38<br>[.35, .41] |          |           | .18<br>[.14, .23] |          |           | .17<br>[.12, .26] |
|                                           | 0 - 8          | 1.79     | 2.13      |                   | 2.10     | 2.42      |                   | 1.97     | 2.23      |                   |
|                                           | 0 - 8          | 2.86     | 2.44      |                   | 2.56     | 2.44      |                   | 3.10     | 2.51      |                   |
|                                           | 0 - 8          | 2.54     | 2.54      |                   | 3.02     | 2.70      |                   | 2.66     | 2.47      |                   |
|                                           | 0 - 8          | 2.25     | 2.17      |                   | 2.28     | 2.11      |                   | 2.81     | 2.24      |                   |
| Psychosomatic<br>complaints               | 0 - 8          | 1.77     | 1.26      | .75<br>[.74, .76] | 1.93     | 1.44      | .79<br>[.78, .80] | 1.52     | 1.29      | .79<br>[.78, .80] |
| Aggression as<br>perpetrator              | 0 - 8          | .60      | .74       | .80<br>[.79, .81] | .61      | .78       | .77<br>[.76, .78] | .48      | .72       | .81<br>[.80, .82] |
| Aggression as victim                      | 0 - 8          | .55      | .64       | .70<br>[.68, .71] | .55      | .70       | .70<br>[.69, .72] | .48      | .65       | .72<br>[.70, .73] |
| Craving for internet<br>activities        | 0 - 8          | 1.93     | 1.09      | .60<br>[.58, .62] | 2.27     | 1.21      | .59<br>[.57, .61] | 1.90     | 1.14      | .61<br>[.59, .63] |
| Pandemic-related fears                    | 0 - 8          | 1.19     | 1.05      | .84<br>[.84, .85] | 2.67     | 1.40      | .84<br>[.83, .85] | 1.85     | 1.15      | .82<br>[.81, .83] |
| Pandemic-related<br>behaviors             | 0 - 8          | .57      | .92       | .81<br>[.80, .82] | 1.51     | 1.48      | .81<br>[.80, .82] | .49      | .87       | .80<br>[.79, .81] |
| Alcohol consumption<br>(AUDIT-C)          | 0 - 12         | 2.65     | 2.04      | .64<br>[.62, .66] | 2.52     | 2.28      | .66<br>[.65, .68] | 2.58     | 2.21      | .68<br>[.66, .69] |
| Internet Use<br>(CIUS-5)                  | 0 - 20         | 4.52     | 3.78      | .78<br>[.77, .80] | 4.90     | 4.31      | .82<br>[.81, .82] | 3.79     | 3.84      | .82<br>[.81, .83] |
| Perceived stress<br>(PSS-4)               | 0 - 16         | 5.86     | 2.78      | .76<br>[.75, .77] | 7.09     | 3.06      | .79<br>[.78, .80] | 6.05     | 3.04      | .80<br>[.79, .81] |
| Depressive symptoms<br>(PHQ-2)            | 0 - 6          | 1.34     | 1.23      | .73<br>[.71, .74] | 1.89     | 1.51      | .80<br>[.78, .81] | 1.47     | 1.37      | .78<br>[.77, .80] |
| Anxiety symptoms<br>(GAD-2)               | 0 - 6          | 1.25     | 1.32      | .75<br>[.73, .77] | 1.83     | 1.61      | .80<br>[.79, .81] | 1.42     | 1.45      | .80<br>[.79, .81] |
| News consumption*                         | 0 - 8          | 5.04     | 2.11      |                   | 6.75     | 1.61      |                   | 5.59     | 2.05      |                   |
| Alcohol loss of<br>control*               | 0 - 8          | .43      | 1.13      |                   | .75      | 1.56      |                   | .61      | 1.37      |                   |
| Overall stress*                           | 0 - 8          | 4.00     | 2.07      |                   | 4.59     | 2.30      |                   | 3.91     | 2.14      |                   |
| Loneliness*                               | 0 - 8          | 1.85     | 2.08      |                   | 3.24     | 2.52      |                   | 2.44     | 2.20      |                   |
| Overall anxiety*                          | 0 - 8          | 1.94     | 1.90      |                   | 3.57     | 2.30      |                   | 2.49     | 2.08      |                   |
| <i>Resilience indicators</i>              |                |          |           |                   |          |           |                   |          |           |                   |
| Stress recovery                           | 0 - 8          | 5.03     | 1.65      | .75<br>[.73, .77] | 4.60     | 1.88      | .82<br>[.81, .83] | 4.92     | 1.83      | .81<br>[.80, .82] |
| Crises as a chance                        | 0 - 8          | 4.10     | 1.95      | .74<br>[.72, .76] | 4.09     | 2.04      | .78<br>[.77, .79] | 4.07     | 2.05      | .81<br>[.79, .82] |
| Coping during crises                      | 0 - 8          | 4.49     | 1.18      | .74<br>[.73, .75] | 4.22     | 1.16      | .71<br>[.70, .73] | 4.38     | 1.17      | .73<br>[.72, .74] |
| Self-efficacy (ASKU)                      | 1 - 5          | 4.37     | .72       | .89<br>[.88, .89] | 4.04     | .89       | .90<br>[.90, .91] | 4.18     | .83       | .91<br>[.91, .92] |
| Optimism*                                 | 0 - 8          | 5.69     | 1.72      |                   | 4.33     | 1.92      |                   | 5.03     | 1.82      |                   |
| Life satisfaction*                        | 0 - 8          | 5.77     | 1.64      |                   | 4.66     | 1.94      |                   | 5.41     | 1.71      |                   |

*Note.* Sample mean (*M*), standard deviation (*SD*), Cronbach's Alpha with 95% confidence interval ( $\alpha$ ) for indicators at three measurement occasions of January 2020 (T1), mid of March to mid of April 2020 (T2) and June 2020 (T3). There was no missing data. \* = single-item indicator.

**Table S2.** Item statistics for social cohesion indicators

| <i>Social cohesion indicators</i>      | scale<br>range | T1       |           |     | T2       |           |     | T3       |           |     |
|----------------------------------------|----------------|----------|-----------|-----|----------|-----------|-----|----------|-----------|-----|
|                                        |                | <i>M</i> | <i>SD</i> | NA  | <i>M</i> | <i>SD</i> | NA  | <i>M</i> | <i>SD</i> | NA  |
| Belonging family                       | 1-100          | 6.36     | 2.05      | -   | 6.15     | 2.30      | -   | 6.40     | 2.06      | -   |
| Belonging friends                      | 1-100          | 6.04     | 1.87      | -   | 5.03     | 2.40      | -   | 5.86     | 1.99      | -   |
| Belonging neighborhood                 | 1-100          | 3.65     | 2.43      | -   | 3.15     | 2.55      | -   | 3.41     | 2.54      | -   |
| Belonging Berlin                       | 1-100          | 3.35     | 2.38      | -   | 2.57     | 2.40      | -   | 2.95     | 2.42      | -   |
| Belonging Germany                      | 1-100          | 2.99     | 2.44      | -   | 2.39     | 2.44      | -   | 2.55     | 2.40      | -   |
| Belonging Europe                       | 1-100          | 3.02     | 2.51      | -   | 2.47     | 2.51      | -   | 2.60     | 2.48      | -   |
| Belonging World                        | 1-100          | 2.67     | 2.52      | -   | 2.28     | 2.51      | -   | 2.37     | 2.48      | -   |
| Trust family                           | 0 - 8          | 6.98     | 1.64      | -   | 7.02     | 1.65      | -   | 7.05     | 1.64      | -   |
| Trust friends                          | 0 - 8          | 6.70     | 1.43      | -   | 6.60     | 1.57      | -   | 6.70     | 1.50      | -   |
| Trust neighbors                        | 0 - 8          | 4.10     | 1.89      | -   | 4.07     | 2.05      | -   | 3.97     | 2.08      | -   |
| Trust fellow citizens                  | 0 - 8          | 3.32     | 1.55      | -   | 3.14     | 1.71      | -   | 3.00     | 1.66      | -   |
| Trust media                            | 0 - 8          | 5.24     | 2.12      | -   | 5.45     | 2.24      | -   | 5.32     | 2.29      | -   |
| Trust police                           | 0 - 8          | 5.29     | 1.96      | -   | 5.37     | 2.08      | -   | 5.26     | 2.17      | -   |
| Trust senate                           | 0 - 8          | 4.12     | 1.93      | -   | 4.37     | 2.15      | -   | 4.27     | 2.18      | -   |
| Trust chancellor                       | 0 - 8          | 5.37     | 2.06      | -   | 5.63     | 2.21      | -   | 5.46     | 2.28      | -   |
| Trust government                       | 0 - 8          | 4.72     | 1.97      | -   | 5.09     | 2.15      | -   | 4.87     | 2.18      | -   |
| Trust health system                    | 0 - 8          | 5.88     | 1.76      | -   | 6.01     | 1.84      | -   | 6.06     | 1.82      | -   |
| Trust science                          | 0 - 8          | 6.62     | 1.47      | -   | 6.63     | 1.68      | -   | 6.61     | 1.72      | -   |
| Interaction frequency partner          | 0 - 8          | 3.74     | .70       | 925 | 3.68     | .88       | 938 | 3.72     | .74       | 927 |
| Interaction quality partner            | -4 - 4         | 2.33     | 1.89      | 925 | 2.20     | 1.94      | 938 | 2.37     | 1.89      | 927 |
| Interaction frequency family           | 0 - 8          | 2.60     | 1.22      | 97  | 1.87     | 1.56      | 175 | 2.47     | 1.26      | 97  |
| Interaction quality family             | -4 - 4         | 2.62     | 1.57      | 97  | 2.00     | 1.81      | 175 | 2.69     | 1.54      | 97  |
| Interaction frequency friends          | 0 - 8          | 2.50     | .98       | 81  | 1.09     | 1.04      | 196 | 2.24     | 1.01      | 62  |
| Interaction quality friends            | -4 - 4         | 2.97     | 1.26      | 81  | 1.85     | 1.77      | 196 | 2.88     | 1.35      | 62  |
| Interaction frequency colleagues       | 0 - 8          | 3.17     | 1.09      | 517 | 1.55     | 1.49      | 728 | 2.20     | 1.35      | 632 |
| Interaction quality colleagues         | -4 - 4         | 1.57     | 1.59      | 517 | .84      | 1.58      | 728 | 1.29     | 1.64      | 632 |
| Interaction frequency supervisors      | 0 - 8          | 2.65     | 1.21      | 731 | 1.24     | 1.38      | 915 | 1.72     | 1.32      | 845 |
| Interaction quality supervisors        | -4 - 4         | .95      | 1.81      | 731 | .43      | 1.51      | 915 | .70      | 1.67      | 845 |
| Interaction frequency others           | 0 - 8          | 2.19     | 1.03      | 173 | 1.02     | .91       | 453 | 1.51     | 1.00      | 397 |
| Interaction quality others             | -4 - 4         | .83      | 1.45      | 173 | .11      | 1.43      | 453 | .39      | 1.46      | 397 |
| Prosocial frequency self -partner      | 0 - 4          | 3.25     | .84       | 914 | 3.21     | .89       | 924 | 3.17     | .90       | 915 |
| Prosocial frequency partner - self     | 0 - 4          | 3.06     | 1.01      | 931 | 3.08     | 1.01      | 922 | 3.05     | 1.02      | 922 |
| Prosocial frequency self -family       | 0 - 4          | 2.73     | 1.06      | 52  | 2.67     | 1.13      | 61  | 2.60     | 1.10      | 51  |
| Prosocial frequency family - self      | 0 - 4          | 2.34     | 1.12      | 69  | 2.27     | 1.19      | 79  | 2.34     | 1.14      | 58  |
| Prosocial frequency self -friends      | 0 - 4          | 2.37     | 1.02      | 73  | 2.08     | 1.12      | 79  | 2.15     | 1.05      | 60  |
| Prosocial frequency friends - self     | 0 - 4          | 2.11     | 1.04      | 94  | 1.89     | 1.14      | 92  | 2.05     | 1.07      | 62  |
| Prosocial frequency self -neighbors    | 0 - 4          | 1.19     | 1.03      | 154 | 1.17     | 1.09      | 158 | 1.03     | 1.02      | 148 |
| Prosocial frequency neighbors - self   | 0 - 4          | .96      | .98       | 229 | .91      | 1.03      | 190 | .86      | .98       | 164 |
| Prosocial frequency self -colleagues   | 0 - 4          | 1.99     | 1.07      | 537 | 1.65     | 1.15      | 652 | 1.66     | 1.11      | 636 |
| Prosocial frequency colleagues - self  | 0 - 4          | 1.60     | 1.01      | 558 | 1.34     | 1.06      | 648 | 1.38     | 1.04      | 639 |
| Prosocial frequency self - supervisors | 0 - 4          | 1.49     | 1.19      | 768 | 1.20     | 1.16      | 844 | 1.20     | 1.14      | 834 |
| Prosocial frequency supervisors - self | 0 - 4          | 1.17     | 1.04      | 784 | 1.04     | 1.05      | 838 | 1.02     | 1.01      | 841 |
| Prosocial frequency self -others       | 0 - 4          | 1.04     | .93       | 536 | .75      | .91       | 694 | .75      | .86       | 602 |
| Prosocial frequency others - self      | 0 - 4          | .67      | .78       | 649 | .46      | .72       | 740 | .52      | .73       | 644 |
| Prosocial efforts                      | 0 - 8          | 3.19     | 1.70      | -   | 3.13     | 1.83      | -   | 3.01     | 1.78      | -   |
| Political participation                | 0 - 8          | 2.95     | 2.37      | -   | 1.75     | 2.18      | -   | 1.98     | 2.18      | -   |
| Social participation                   | 0 - 8          | 3.93     | 2.60      | -   | 1.29     | 1.76      | -   | 2.94     | 2.47      | -   |

*Note.* Sample mean (*M*), standard deviation (*SD*), and not available data cases (NA) for indicators at three measurement occasions of January 2020 (T1), mid of March to mid of April 2020 (T2) and June 2020 (T3).
