# Supplementary material for: Coping with the COVID-19 Pandemic: Perceived Changes in Psychological Vulnerability, Resilience and Social Cohesion before, during and after Lockdown
Source: MDPI journal article supplement (doi:10.3390/ijerph19063290), 2022-03-10
Supplement: s1 [file s1]

### Supplement S3. Exploratory factor analyses

**Table S3.** Factor loadings of vulnerability indicators at T1

|                                 | Factor 1   | Factor 2   | Factor 3   | Factor 4   | Factor 5   |
|---------------------------------|------------|------------|------------|------------|------------|
| Anxiety symptoms (GAD-2)        | <b>.89</b> | -.04       | -.07       | -.06       | .01        |
| Depressive symptoms (PHQ-2)     | <b>.79</b> | -.02       | -.13       | .06        | .03        |
| Overall Anxiety                 | <b>.72</b> | -.04       | .07        | -.03       | -.02       |
| Perceived stress (PSS-4)        | <b>.68</b> | .01        | .02        | .07        | .01        |
| Loneliness                      | <b>.63</b> | .01        | -.09       | .09        | .04        |
| Psychosomatic complaints        | <b>.60</b> | .06        | .11        | .00        | -.05       |
| Overall stress                  | <b>.59</b> | .00        | -.03       | -.10       | .00        |
| Burdens                         | <b>.52</b> | .06        | <b>.35</b> | .00        | -.01       |
| Aggression as victim            | .02        | <b>.93</b> | -.12       | .03        | -.02       |
| Aggression as perpetrator       | -.01       | <b>.69</b> | -.02       | .00        | .05        |
| Pandemic-related fears          | .19        | -.12       | <b>.83</b> | -.06       | .02        |
| Pandemic-related behaviours     | -.03       | -.01       | <b>.49</b> | -.03       | -.04       |
| Craving for internet activities | -.09       | .01        | .04        | <b>.79</b> | -.01       |
| Internet Use (CIUS-5)           | .09        | .01        | -.02       | <b>.65</b> | .00        |
| Alcohol consumption (AUDIT-C)   | -.09       | .03        | -.03       | -.01       | <b>.77</b> |
| Alcohol loss of control         | .09        | .02        | .05        | .00        | <b>.63</b> |
| News consumption                | -.03       | -.05       | .20        | .02        | .03        |
| Protection measures item 1      | -.03       | .08        | .13        | -.02       | .00        |
| Protection measures item 4      | .02        | .04        | .18        | .04        | -.02       |
| Eigenvalues                     | 3.91       | 1.26       | 1.15       | 1.13       | 1.05       |
| Variance proportion             | .21        | .07        | .06        | .06        | .06        |

*Note.* Factor loadings above .30 in bold

**Table S4.** Factor loadings of vulnerability indicators at T2

|                                 | Factor 1   | Factor 2   | Factor 3   | Factor 4   | Factor 5   |
|---------------------------------|------------|------------|------------|------------|------------|
| Anxiety symptoms (GAD-2)        | <b>.88</b> | -.08       | -.17       | .15        | -.02       |
| Depressive symptoms (PHQ-2)     | <b>.85</b> | -.04       | .05        | -.02       | -.03       |
| Overall Anxiety                 | <b>.82</b> | -.04       | -.03       | .06        | -.05       |
| Perceived stress (PSS-4)        | <b>.63</b> | -.08       | -.02       | .13        | -.01       |
| Loneliness                      | <b>.62</b> | .12        | .14        | -.07       | -.03       |
| Psychosomatic complaints        | <b>.60</b> | -.09       | <b>.41</b> | -.07       | -.05       |
| Overall stress                  | <b>.58</b> | .05        | .22        | -.20       | -.01       |
| Burdens                         | <b>.54</b> | .16        | <b>.31</b> | -.01       | .00        |
| Aggression as victim            | -.02       | <b>.87</b> | -.07       | -.06       | .05        |
| Aggression as perpetrator       | .01        | <b>.82</b> | -.06       | -.07       | .06        |
| Pandemic-related fears          | .21        | -.01       | <b>.69</b> | .04        | .01        |
| Pandemic-related behaviours     | -.03       | .02        | <b>.54</b> | .06        | .02        |
| Craving for internet activities | -.03       | -.07       | .10        | <b>.71</b> | .07        |
| Internet Use (CIUS-5)           | .19        | -.04       | -.02       | <b>.68</b> | .01        |
| Alcohol consumption (AUDIT-C)   | -.14       | .04        | .09        | .02        | <b>.86</b> |
| Alcohol loss of control         | .04        | .05        | .18        | .06        | <b>.77</b> |
| News consumption                | -.02       | -.04       | <b>.31</b> | .00        | .07        |
| Protection measures item 1      | .22        | .06        | -.15       | .02        | .06        |
| Protection measures item 4      | -.03       | .10        | .06        | .08        | -.05       |
| Eigenvalues                     | 4.38       | 1.43       | 1.34       | 1.32       | 1.04       |
| Variance proportion             | .23        | .08        | .07        | .07        | .05        |

*Note.* Factor loadings above .30 in bold

**Table S5.** Factor loadings of vulnerability indicators at T3

|                                 | Factor 1   | Factor 2   | Factor 3   | Factor 4   | Factor 5   |
|---------------------------------|------------|------------|------------|------------|------------|
| Anxiety symptoms (GAD-2)        | <b>.91</b> | -.08       | -.09       | .00        | -.02       |
| Depressive symptoms (PHQ-2)     | <b>.88</b> | -.06       | -.18       | .10        | .01        |
| Overall Anxiety                 | <b>.70</b> | -.02       | -.09       | .06        | -.01       |
| Perceived stress (PSS-4)        | <b>.69</b> | -.07       | .18        | -.04       | -.03       |
| Loneliness                      | <b>.64</b> | .06        | .14        | -.05       | -.04       |
| Psychosomatic complaints        | <b>.60</b> | .01        | .11        | -.13       | .00        |
| Overall stress                  | <b>.51</b> | .11        | <b>.39</b> | -.01       | .04        |
| Burdens                         | .27        | -.02       | .06        | .00        | .00        |
| Aggression as victim            | -.13       | <b>.89</b> | .01        | -.04       | -.01       |
| Aggression as perpetrator       | -.04       | <b>.81</b> | .10        | -.07       | .01        |
| Pandemic-related fears          | .17        | .01        | <b>.72</b> | -.03       | .09        |
| Pandemic-related behaviours     | -.03       | .12        | <b>.40</b> | .05        | -.03       |
| Craving for internet activities | .15        | -.04       | -.03       | <b>.72</b> | .00        |
| Internet Use (CIUS-5)           | -.10       | -.03       | .11        | <b>.63</b> | .06        |
| Alcohol consumption (AUDIT-C)   | -.17       | .00        | .01        | .03        | <b>.88</b> |
| Alcohol loss of control         | .10        | .01        | .03        | .05        | <b>.66</b> |
| News consumption                | .00        | -.03       | .27        | -.03       | .03        |
| Protection measures item 1      | .11        | .10        | -.07       | .05        | .01        |
| Protection measures item 4      | -.03       | -.01       | .21        | .11        | -.05       |
| Eigenvalues                     | 4.30       | 1.37       | 1.29       | 1.21       | 1.03       |
| Variance proportion             | .25        | .08        | .08        | .07        | .06        |

*Note.* Factor loadings above .30 in bold

**Table S6.** Factor loadings of resilience indicators at T1

|                     | Factor 1   | Factor 2   |
|---------------------|------------|------------|
| Life satisfaction   | <b>.80</b> | -.02       |
| Optimism            | <b>.73</b> | .01        |
| Self-efficacy       | <b>.64</b> | .04        |
| Resistance          | <b>.58</b> | -.03       |
| Coping              | .03        | <b>.68</b> |
| Chance              | -.03       | <b>.67</b> |
| Eigenvalues         | 1.92       | 0.91       |
| Variance proportion | 0.32       | 0.15       |

*Note.* Factor loadings above .30 in bold

**Table S7.** Factor loadings of resilience indicators at T2

|                     | Factor 1   | Factor 2   |
|---------------------|------------|------------|
| Life satisfaction   | <b>.79</b> | -.08       |
| Optimism            | <b>.76</b> | -.01       |
| Self-efficacy       | <b>.67</b> | -.01       |
| Resistance          | <b>.66</b> | .10        |
| Coping              | -.10       | <b>.67</b> |
| Chance              | .14        | <b>.63</b> |
| Eigenvalues         | 2.12       | 0.86       |
| Variance proportion | 0.35       | 0.14       |

*Note.* Factor loadings above .30 in bold

**Table S8.** Factor loadings of resilience indicators at T3

|                     | Factor 1   | Factor 2   |
|---------------------|------------|------------|
| Life satisfaction   | <b>.77</b> | .05        |
| Optimism            | <b>.76</b> | -.10       |
| Self-efficacy       | <b>.74</b> | .05        |
| Resistance          | <b>.69</b> | .06        |
| Coping              | .05        | <b>.64</b> |
| Chance              | -.04       | <b>.64</b> |
| Eigenvalues         | 2.23       | 0.87       |
| Variance proportion | 0.37       | 0.15       |

*Note.* Factor loadings above .30 in bold

**Table S9.** Factor loadings of social cohesion items at T1

|                                      | Factor<br>1 | Factor<br>2 | Factor<br>3 | Factor<br>4 | Factor<br>5 | Factor<br>6 | Factor<br>7 |
|--------------------------------------|-------------|-------------|-------------|-------------|-------------|-------------|-------------|
| Belonging family                     | -.05        | .20         | <b>.75</b>  | .05         | -.03        | -.04        | -.12        |
| Belonging friends                    | -.07        | .28         | .06         | <b>.70</b>  | .00         | .14         | -.25        |
| Belonging neighborhood               | -.13        | <b>.39</b>  | .11         | .08         | <b>.57</b>  | -.06        | -.15        |
| Belonging Berlin                     | -.03        | <b>.83</b>  | .00         | .05         | .01         | .01         | -.01        |
| Belonging Germany                    | .06         | <b>.92</b>  | .06         | -.10        | -.06        | .02         | -.03        |
| Belonging Europe                     | .07         | <b>.97</b>  | -.07        | -.07        | -.11        | .04         | .00         |
| Belonging World                      | .04         | <b>.86</b>  | -.06        | -.09        | -.07        | .02         | .05         |
| Trust family                         | .01         | -.08        | .74         | .12         | .01         | -.13        | -.06        |
| Trust friends                        | .02         | -.12        | .04         | <b>.74</b>  | .12         | .01         | -.10        |
| Trust neighbors                      | .05         | -.08        | .06         | .15         | <b>.69</b>  | -.25        | .01         |
| Trust fellow citizens                | .20         | .11         | .01         | .13         | .21         | -.20        | .24         |
| Trust media                          | <b>.71</b>  | .00         | -.09        | .08         | -.03        | -.06        | .06         |
| Trust police                         | <b>.56</b>  | -.01        | .13         | -.10        | .12         | -.04        | -.07        |
| Trust senate                         | <b>.68</b>  | .02         | -.01        | -.03        | -.01        | -.02        | .07         |
| Trust chancellor                     | <b>.85</b>  | .01         | .01         | -.07        | -.03        | .04         | .04         |
| Trust government                     | <b>.91</b>  | .01         | .00         | -.08        | .01         | .05         | .02         |
| Trust health system                  | <b>.63</b>  | .03         | .01         | .03         | .01         | .07         | -.11        |
| Trust science                        | <b>.58</b>  | .03         | -.06        | .12         | -.10        | .06         | -.04        |
| Interaction frequency family         | -.02        | -.04        | <b>.61</b>  | -.06        | .01         | .10         | .05         |
| Interaction quality family           | .00         | -.08        | <b>.73</b>  | .06         | -.08        | -.05        | .09         |
| Interaction frequency friends        | -.03        | -.02        | -.07        | <b>.66</b>  | -.08        | .30         | .02         |
| Interaction quality friends          | .07         | -.12        | .09         | <b>.64</b>  | -.08        | .10         | .04         |
| Interaction frequency others         | -.09        | .04         | .04         | .14         | -.09        | -.04        | <b>.42</b>  |
| Interaction quality others           | .01         | .01         | .08         | .10         | -.04        | -.16        | <b>.42</b>  |
| Prosocial frequency self -family     | .03         | .03         | <b>.58</b>  | -.10        | .04         | <b>.44</b>  | .03         |
| Prosocial frequency family - self    | .08         | -.03        | <b>.56</b>  | .06         | -.05        | <b>.44</b>  | .02         |
| Prosocial frequency self -friends    | .04         | .01         | -.06        | <b>.41</b>  | .06         | <b>.77</b>  | -.05        |
| Prosocial frequency friends - self   | .07         | -.05        | -.07        | <b>.51</b>  | .08         | <b>.68</b>  | -.02        |
| Prosocial frequency self -neighbors  | -.02        | -.08        | -.07        | -.11        | <b>.79</b>  | .28         | .04         |
| Prosocial frequency neighbors - self | .00         | -.12        | -.10        | -.04        | <b>.84</b>  | .23         | .03         |
| Prosocial frequency self -others     | .02         | -.01        | -.03        | -.19        | .06         | .12         | <b>.74</b>  |
| Prosocial frequency others - self    | .06         | -.07        | -.05        | -.09        | .05         | .13         | <b>.67</b>  |
| Prosocial efforts                    | -.03        | .06         | .04         | -.05        | .06         | .15         | .10         |
| Political participation              | .01         | .12         | -.07        | .14         | .03         | .05         | .15         |
| Social participation                 | -.05        | -.02        | .00         | <b>.31</b>  | .03         | .12         | .14         |
| Eigenvalue                           | 3.67        | 3.44        | 2.80        | 2.49        | 2.21        | 1.90        | 1.47        |
| Variance proportion                  | .10         | .10         | .08         | .07         | .06         | .05         | .04         |

*Note.* Factor loadings above .30 in bold

**Table S10.** Factor loadings of social cohesion items at T2

|                                      | Factor<br>1 | Factor<br>2 | Factor<br>3 | Factor<br>4 | Factor<br>5 | Factor<br>6 | Factor<br>7 |
|--------------------------------------|-------------|-------------|-------------|-------------|-------------|-------------|-------------|
| Belonging family                     | -.03        | .28         | <b>.64</b>  | .07         | -.06        | -.05        | -.24        |
| Belonging friends                    | -.05        | <b>.43</b>  | .02         | .04         | .26         | <b>.33</b>  | -.24        |
| Belonging neighborhood               | -.14        | <b>.46</b>  | .02         | <b>.53</b>  | -.05        | -.07        | .08         |
| Belonging Berlin                     | .00         | <b>.86</b>  | .00         | .05         | -.07        | -.05        | .09         |
| Belonging Germany                    | .05         | <b>.94</b>  | .03         | -.04        | -.07        | -.11        | .06         |
| Belonging Europe                     | .03         | <b>.99</b>  | -.04        | -.08        | -.02        | -.12        | .06         |
| Belonging World                      | .00         | <b>.92</b>  | -.03        | -.10        | -.04        | -.12        | .09         |
| Trust family                         | .01         | -.01        | <b>.58</b>  | .18         | .00         | -.04        | -.28        |
| Trust friends                        | .05         | -.03        | .04         | .27         | <b>.33</b>  | <b>.30</b>  | <b>-.36</b> |
| Trust neighbors                      | -.02        | -.06        | .04         | <b>.93</b>  | -.13        | -.08        | .04         |
| Trust fellow citizens                | .18         | .11         | .01         | <b>.46</b>  | -.07        | .11         | .04         |
| Trust media                          | <b>.78</b>  | .02         | -.06        | -.01        | .04         | .00         | .02         |
| Trust police                         | <b>.59</b>  | -.06        | .12         | .07         | -.08        | -.05        | .01         |
| Trust senate                         | <b>.71</b>  | .04         | .00         | .01         | -.04        | .02         | .06         |
| Trust chancellor                     | <b>.90</b>  | .01         | -.01        | -.06        | .02         | -.04        | .07         |
| Trust government                     | <b>.95</b>  | .01         | -.02        | -.06        | .01         | -.05        | .09         |
| Trust health system                  | <b>.65</b>  | -.03        | .02         | -.03        | .03         | .05         | -.07        |
| Trust science                        | <b>.62</b>  | .03         | -.05        | -.03        | .08         | .02         | -.03        |
| Interaction frequency family         | -.03        | -.07        | <b>.66</b>  | -.07        | -.19        | .13         | .12         |
| Interaction quality family           | .00         | -.10        | <b>.68</b>  | .02         | -.15        | .23         | .02         |
| Interaction frequency friends        | -.02        | -.13        | .02         | -.15        | .14         | .74         | .17         |
| Interaction quality friends          | .04         | -.12        | .01         | .00         | .18         | <b>.69</b>  | .02         |
| Interaction frequency others         | -.02        | -.01        | .03         | .02         | -.13        | .13         | <b>.32</b>  |
| Interaction quality others           | .07         | .05         | .00         | .20         | -.11        | .12         | .19         |
| Prosocial frequency self -family     | .04         | -.02        | <b>.66</b>  | -.05        | .27         | -.25        | .14         |
| Prosocial frequency family - self    | .01         | -.01        | <b>.58</b>  | -.07        | <b>.36</b>  | -.08        | .04         |
| Prosocial frequency self -friends    | .01         | -.05        | -.07        | -.05        | <b>.84</b>  | .18         | .10         |
| Prosocial frequency friends - self   | .02         | -.06        | -.09        | .01         | <b>.83</b>  | .26         | .04         |
| Prosocial frequency self -neighbors  | -.07        | -.11        | -.03        | <b>.62</b>  | .22         | -.17        | <b>.39</b>  |
| Prosocial frequency neighbors - self | -.11        | -.15        | -.05        | <b>.67</b>  | .20         | -.12        | <b>.37</b>  |
| Prosocial frequency self -others     | .04         | .07         | -.04        | .12         | .14         | -.02        | <b>.57</b>  |
| Prosocial frequency others - self    | .09         | .05         | -.05        | .13         | .13         | .01         | <b>.53</b>  |
| Prosocial efforts                    | .01         | .01         | .15         | -.04        | .14         | -.03        | .13         |
| Political participation              | -.02        | .12         | -.02        | -.07        | .11         | .13         | .18         |
| Social participation                 | -.06        | .02         | .06         | -.01        | .02         | .29         | .21         |
| Eigenvalue                           | 4.01        | 3.88        | 2.50        | 2.38        | 2.20        | 1.54        | 1.65        |
| Variance proportion                  | .11         | .11         | .07         | .07         | .06         | .04         | .05         |

*Note.* Factor loadings above .30 in bold

**Table S11.** Factor loadings of social cohesion items at T3

|                                      | Factor<br>1 | Factor<br>2 | Factor<br>3 | Factor<br>4 | Factor<br>5 | Factor<br>6 | Factor<br>7 |
|--------------------------------------|-------------|-------------|-------------|-------------|-------------|-------------|-------------|
| Belonging family                     | -.02        | .21         | <b>.76</b>  | .03         | -.03        | .03         | -.10        |
| Belonging friends                    | -.04        | .28         | .11         | <b>.63</b>  | .00         | .08         | -.10        |
| Belonging neighborhood               | -.14        | <b>.50</b>  | .05         | .05         | <b>.56</b>  | -.05        | -.08        |
| Belonging Berlin                     | -.02        | <b>.82</b>  | .01         | .05         | .04         | -.06        | .06         |
| Belonging Germany                    | .05         | <b>.90</b>  | .04         | -.06        | .00         | -.02        | .01         |
| Belonging Europe                     | .05         | <b>.97</b>  | -.02        | -.07        | -.06        | .03         | -.04        |
| Belonging World                      | .03         | <b>.91</b>  | -.03        | -.09        | -.08        | .05         | -.01        |
| Trust family                         | .06         | -.03        | <b>.74</b>  | .09         | -.04        | -.02        | -.03        |
| Trust friends                        | .11         | -.07        | .06         | <b>.69</b>  | .09         | .08         | -.08        |
| Trust neighbors                      | .01         | -.01        | .03         | .14         | <b>.75</b>  | -.17        | .03         |
| Trust fellow citizens                | .17         | .08         | .05         | .12         | .27         | -.21        | .28         |
| Trust media                          | <b>.79</b>  | .03         | -.07        | .06         | -.05        | .03         | .01         |
| Trust police                         | <b>.54</b>  | -.06        | .13         | -.08        | .09         | -.05        | .01         |
| Trust senate                         | <b>.73</b>  | .05         | -.03        | -.02        | -.02        | -.02        | .06         |
| Trust chancellor                     | <b>.89</b>  | .04         | -.03        | -.03        | -.01        | .08         | -.05        |
| Trust government                     | <b>.95</b>  | .01         | -.03        | -.05        | .01         | .07         | -.02        |
| Trust health system                  | <b>.65</b>  | -.01        | .01         | .07         | -.06        | .01         | -.01        |
| Trust science                        | <b>.66</b>  | .02         | -.07        | .05         | -.07        | .05         | -.03        |
| Interaction frequency family         | -.09        | -.04        | <b>.66</b>  | -.04        | -.05        | .06         | .09         |
| Interaction quality family           | -.04        | -.07        | <b>.76</b>  | .13         | -.08        | -.02        | .04         |
| Interaction frequency friends        | -.08        | -.04        | -.04        | <b>.66</b>  | -.07        | .16         | .10         |
| Interaction quality friends          | .03         | -.12        | .08         | <b>.72</b>  | .01         | .05         | .03         |
| Interaction frequency others         | -.05        | -.01        | .06         | .04         | -.05        | -.09        | <b>.50</b>  |
| Interaction quality others           | .07         | -.03        | .05         | .08         | .05         | -.14        | <b>.39</b>  |
| Prosocial frequency self -family     | .05         | .02         | <b>.60</b>  | -.12        | .04         | <b>.52</b>  | -.01        |
| Prosocial frequency family - self    | .04         | -.02        | <b>.58</b>  | .02         | .00         | <b>.55</b>  | -.01        |
| Prosocial frequency self -friends    | .03         | .01         | -.07        | <b>.46</b>  | .10         | <b>.74</b>  | -.07        |
| Prosocial frequency friends - self   | .08         | -.06        | -.08        | <b>.53</b>  | .14         | <b>.72</b>  | -.08        |
| Prosocial frequency self -neighbors  | -.06        | -.05        | -.11        | -.05        | <b>.84</b>  | .31         | .01         |
| Prosocial frequency neighbors - self | -.05        | -.08        | -.13        | -.05        | <b>.88</b>  | .28         | .01         |
| Prosocial frequency self -others     | .00         | -.01        | -.03        | -.18        | .11         | .21         | <b>.70</b>  |
| Prosocial frequency others - self    | .07         | -.04        | -.04        | -.15        | .11         | .17         | <b>.67</b>  |
| Prosocial efforts                    | .01         | .02         | .04         | -.08        | .04         | .22         | .13         |
| Political participation              | -.01        | .12         | -.10        | .07         | -.11        | .14         | .27         |
| Social participation                 | -.08        | -.01        | .00         | .20         | -.05        | .09         | <b>.33</b>  |
| Eigenvalue                           | 4.05        | 3.70        | 2.90        | 2.56        | 2.55        | 2.14        | 1.69        |
| Variance proportion                  | .12         | .11         | .08         | .07         | .07         | .06         | .05         |

*Note.* Factor loadings above .30 in bold
