# Supplementary material for: Coping with the COVID-19 Pandemic: Perceived Changes in Psychological Vulnerability, Resilience and Social Cohesion before, during and after Lockdown
Source: MDPI journal article supplement (doi:10.3390/ijerph19063290), 2022-03-10
Supplement: s1 [file s1]

## Supplement S4

**Table S12.** Factor loadings of social cohesion indicators on first-order and residual latent factors.

| first-order latent factor | indicator                            | factor loading |
|---------------------------|--------------------------------------|----------------|
| belonging                 | belonging family                     | .40            |
|                           | belonging friends                    | .64            |
|                           | belonging neighbors                  | .69            |
|                           | belonging Berlin                     | .76            |
|                           | belonging Germany                    | .68            |
|                           | belonging Europe                     | .54            |
|                           | belonging world                      | .46            |
| trust                     | trust family                         | .28            |
|                           | trust friends                        | .50            |
|                           | trust neighbors                      | .68            |
|                           | trust fellow citizens                | .77            |
|                           | trust public media                   | .25            |
|                           | trust German police                  | .26            |
|                           | trust Berlin senate                  | .29            |
|                           | trust German chancellor              | .21            |
|                           | trust German government              | .25            |
|                           | trust German health system           | .22            |
|                           | trust science                        | .21            |
| social interactions       | frequency interaction family         | .30            |
|                           | valence interaction family           | .27            |
|                           | frequency interaction friends        | .56            |
|                           | valence interaction friends          | .44            |
|                           | frequency interaction others         | .33            |
|                           | valence interaction others           | .20            |
| social engagement         | prosocial frequency self - family    | .50            |
|                           | prosocial frequency family - self    | .66            |
|                           | prosocial frequency self - friends   | .43            |
|                           | prosocial frequency friends - self   | .31            |
|                           | prosocial frequency self - neighbors | .51            |
|                           | prosocial frequency neighbors - self | .70            |
|                           | prosocial frequency self - others    | .45            |
|                           | prosocial frequency others - self    | .36            |
| family                    | belonging family                     | .71            |
|                           | trust family                         | .71            |
|                           | frequency interaction family         | .59            |
|                           | valence interaction family           | .70            |
|                           | prosocial frequency self - family    | .59            |
|                           | prosocial frequency family - self    | .54            |
| friends                   | belonging friends                    | .55            |
|                           | trust friends                        | .59            |
|                           | frequency interaction friends        | .48            |
|                           | valence interaction friends          | .56            |
|                           | prosocial frequency self - friends   | .52            |

|                          |                                      |     |
|--------------------------|--------------------------------------|-----|
|                          | prosocial frequency friends - self   | .44 |
| neighbors                | belonging neighbors                  | .50 |
|                          | trust neighbors                      | .52 |
|                          | prosocial frequency self - neighbors | .70 |
|                          | prosocial frequency neighbors - self | .67 |
| others                   | frequency interaction others         | .37 |
|                          | valence interaction others           | .30 |
|                          | prosocial frequency self - others    | .61 |
|                          | prosocial frequency others - self    | .65 |
| national & international | belonging Berlin                     | .35 |
|                          | belonging Germany                    | .51 |
|                          | belonging Europe                     | .78 |
|                          | belonging world                      | .71 |
|                          | trust fellow citizens                | .07 |
| institutions             | trust public media                   | .61 |
|                          | trust German police                  | .44 |
|                          | trust Berlin senate                  | .65 |
|                          | trust German chancellor              | .85 |
|                          | trust German government              | .88 |
|                          | trust German health system           | .48 |
|                          | trust science                        | .47 |

*Note.* Factor loadings are standardized for an ease of interpretation.
