# Supplementary material for: Coping with the COVID-19 Pandemic: Perceived Changes in Psychological Vulnerability, Resilience and Social Cohesion before, during and after Lockdown
Source: Int J Environ Res Public Health. 2022 Mar 10;19(6):3290. doi: 10.3390/ijerph19063290 (PMC8952288; doi:10.3390/ijerph19063290)
Supplement: Supplementary file 1 [file ijerph-19-03290-s001.zip]

Archive with 5 entries (5 files):
- supplement S1 appendix B.pdf
- Supplement S1.pdf
- Supplement S2.pdf
- Supplement S3.pdf
- Supplement S4.pdf
